# Supplementary material for: Overcoming crystallographically imposed geometrical restrictions on the valence state of Eu in CaGdAlO4: realization of white light emission from singly-doped Eu phosphors
Source: Royal Society of Chemistry journal article supplement (doi:10.1039/c4dt03095h), 2014-12-05
Supplement: c4dt03095h1.pdf [file c4dt03095h1.pdf]

## Supporting Information Available

### **Breakdown of the geometry restriction of crystallographic site on the valence state 5 of Eu in CaGdAlO<sub>4</sub>: realization of white emission from Eu singly-doped phosphors**

**Author(s):** Yang Zhang,<sup>a, b</sup> Xiaoming Liu,<sup>c</sup> Xuejiao Li,<sup>a</sup> Kai Li,<sup>a, b</sup> Hongzhou Lian,<sup>a</sup> Mengmeng Shang,<sup>a</sup> and  
**Jun Lin<sup>a, \*</sup>**

<sup>a</sup>State Key Laboratory of Rare Earth Resource Utilization, Changchun Institute of Applied Chemistry, Chinese Academy of Sciences, Changchun 130022, People's Republic of China

<sup>b</sup> University of the Chinese Academy of Sciences, Beijing 100049, People's Republic of China

<sup>c</sup> School of Environment and Chemical Engineering, Nanchang Hangkong University, Nanchang 330063, P. R.  
15 China.

---

## Experimental Section

**Materials:**  $\text{Gd}_2\text{O}_3$ ,  $\text{Eu}_2\text{O}_3$  (99.999%) was purchased from Science and Technology Parent Company 5 of Changchun Institute of Applied Chemistry.  $\text{Al}_2\text{O}_3$  and  $\text{SiO}_2$  and  $\text{CaCO}_3$  were purchased from Sigma-Aldrich.

**Preparation:**  $\text{Ca}_{0.99+x}\text{Gd}_{1-x}\text{Al}_{1-x}\text{Si}_x\text{O}_4: \text{Eu}_{0.01}$  ( $x = 0-0.25$ ) powder samples were prepared by conventional high temperature solid state reaction process. Firstly, the stoichiometric amount of raw materials was thoroughly mixed by grinding in an agate mortar for 45 min for a good mixing. The mixture was then transferred into crucibles and calcined at 1200 °C for 6 h under a reducing atmosphere of  $\text{N}_2$  (90%) and  $\text{H}_2$  (10%). After that, the sample was reground in a mortar followed by sintering under a reducing atmosphere of  $\text{N}_2$  (90%) and  $\text{H}_2$  (10%) at 1500-1600 °C for 6 h, yielding the resulting samples. The material of the crucible is alumina.

**Characterization:** The X-ray diffraction (XRD) measurements were performed on a D8 Focus 15 diffractometer in the  $2\theta$  range from 20° to 100° operating at 40 kV and 40 mA with graphite-monochromatized  $\text{Cu } K\alpha$  radiation ( $\lambda = 0.15405$  nm). The Rietveld analysis of the XRD was done using the General Structure Analysis System (GSAS) program. Raman spectrum was collected using a micro-Raman spectrometer with a laser of 532 nm wavelength. The photoluminescence (PL) measurements were recorded with a Hitachi F-7000 spectrophotometer equipped with a 150 W xenon 20 lamp as the excitation source. Photoluminescence absolute quantum yields (QY) were measured by an absolute PL quantum yield measurement system (C9920-02, Hamamatsu Photonics K. K., Japan). Time-resolved photoluminescence spectra and luminescence decay curves were obtained from a Lecroy Wave Runner 6100 Digital Oscilloscope (1GHz) (pulse width = 4 ns, gate = 50 ns) as the excitation source (Continuum Sunlite OPO). All the measurements were performed at room 25 temperature (RT).

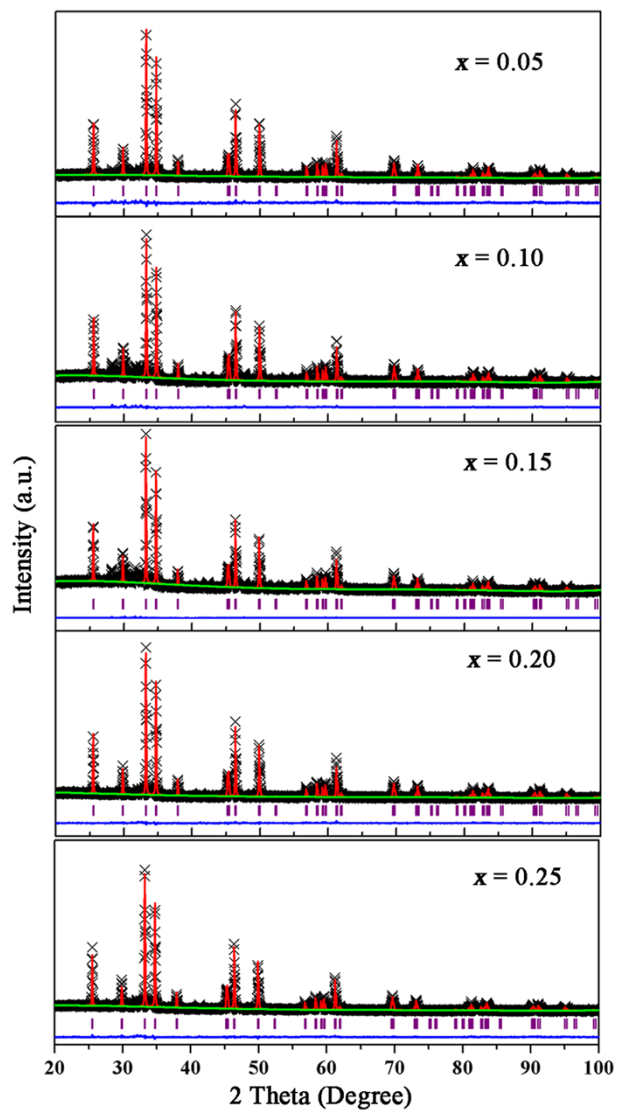

**Fig. S1** The Rietveld refinement to XRD patterns for  $\text{Ca}_{0.99+x}\text{Gd}_{1-x}\text{Al}_{1-x}\text{Si}_x\text{O}_4:\text{Eu}_{0.01}$  ( $x = 0.05-0.25$ ), respectively.

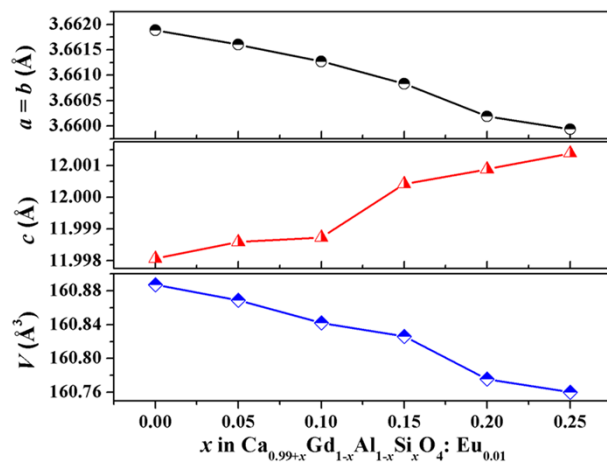

5 **Fig. S2** Unit cell parameters of  $\text{Ca}_{0.99+x}\text{Gd}_{1-x}\text{Al}_{1-x}\text{Si}_x\text{O}_4:\text{Eu}_{0.01}$  ( $x = 0-0.25$ ) obtained from Rietveld refinement, reflecting the effects of the  $\text{Si}^{4+}$ - $\text{Ca}^{2+}$  incorporation.

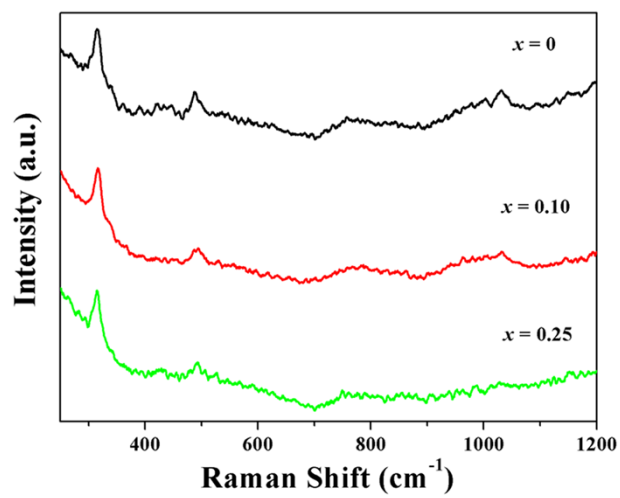

5 **Fig. S3** The Raman spectra of  $\text{Ca}_{0.99+x}\text{Gd}_{1-x}\text{Al}_{1-x}\text{Si}_x\text{O}_4:\text{Eu}_{0.01}$  ( $x = 0, 0.10$  and  $0.25$ ) samples.

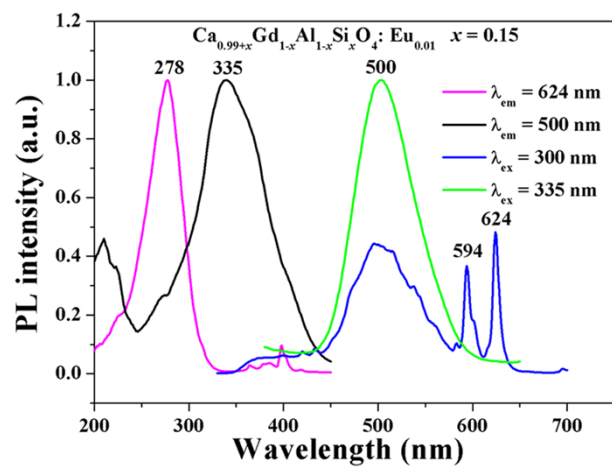

5 **Fig. S4** The PLE and PL spectra Ca<sub>0.99+x</sub>Gd<sub>1-x</sub>Al<sub>1-x</sub>Si<sub>x</sub>O<sub>4</sub>:Eu<sub>0.01</sub> ( $x = 0.15$ ) sample.

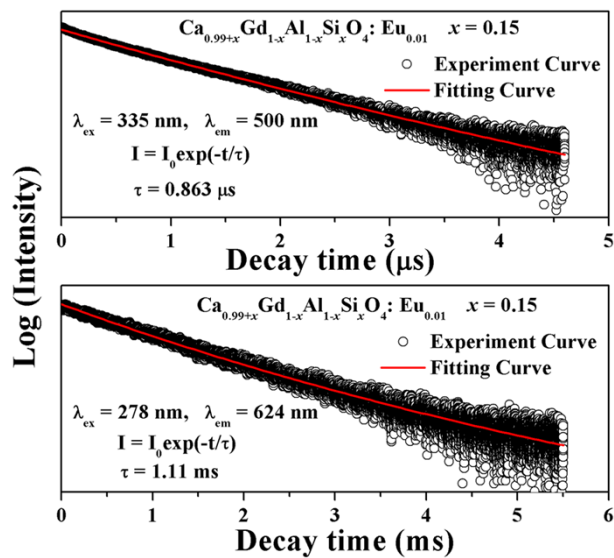

5

**Fig. S5** Decay curves of (a)  $\text{Eu}^{2+}$ :  $\lambda_{\text{ex}} = 335 \text{ nm}$ ,  $\lambda_{\text{em}} = 500 \text{ nm}$ ; (b)  $\text{Eu}^{3+}$ :  $\lambda_{\text{ex}} = 278 \text{ nm}$ ,  $\lambda_{\text{em}} = 624 \text{ nm}$  of  $\text{Ca}_{0.99+x}\text{Gd}_{1-x}\text{Al}_{1-x}\text{SiO}_4:\text{Eu}_{0.01}$  ( $x = 0.15$ ) sample.

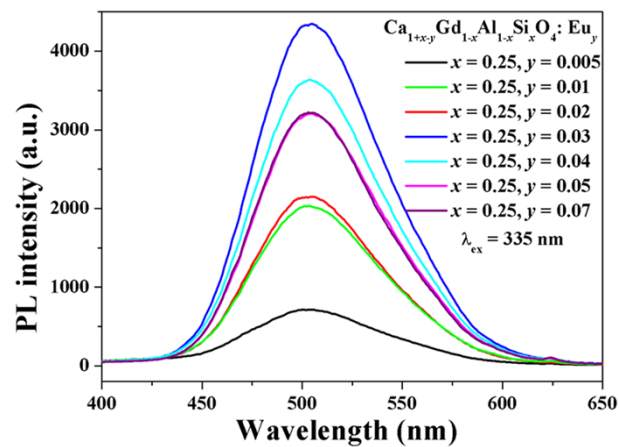

**5 Fig. S6** The influence of doping concentration of Eu ions on the emission intensity of the obtained  $\text{Ca}_{1+x-y}\text{Gd}_{1-x}\text{Al}_{1-x}\text{Si}_4\text{O}_4:\text{Eu}_y$  ( $x = 0.25, y = 0.005-0.07$ ) phosphors,  $\lambda_{\text{ex}} = 335 \text{ nm}$ .

---

**Table S1.** Crystallographic data of  $\text{CaGdAlO}_4: 0.01\text{Eu}^{3+}$ , as determined by the Rietveld refinement of power XRD data at room temperature.

| atom | site | $x$    | $y$    | $z$    | Occupancy |
|------|------|--------|--------|--------|-----------|
| Ca1  | $4e$ | 0.0000 | 0.0000 | 0.3591 | 0.495     |
| Gd1  | $4e$ | 0.0000 | 0.0000 | 0.3591 | 0.500     |
| Al1  | $2a$ | 0.0000 | 0.0000 | 0.0000 | 1.000     |
| O1   | $4c$ | 0.0000 | 0.5000 | 0.0000 | 1.000     |
| O2   | $4e$ | 0.0000 | 0.0000 | 0.1693 | 1.000     |
| Eu1  | $4e$ | 0.0000 | 0.0000 | 0.3591 | 0.005     |

Tetragonal crystal system, space group:  $I4/mmm$  (No. 139),  $Z = 2$ ,  $a = b = 3.66189 \text{ \AA}$ ,  $c = 11.99807 \text{ \AA}$ ,  $V = 160.89 \text{ \AA}^3$ ,  $\alpha = \beta = \gamma = 90^\circ$ ,  $R_p = 2.34\%$ ,  $R_{wp} = 3.29\%$ .

---

---

**Table S2.** Crystallographic data and reliability factor of  $\text{Ca}_{0.99+x}\text{Gd}_{1-x}\text{Al}_{1-x}\text{Si}_x\text{O}_4$ :  $\text{Eu}_{0.01}$  ( $x = 0.05$ - $0.25$ )

samples.

| $x$                   | $x = 0.05$ | $x = 0.10$ | $x = 0.15$ | $x = 0.20$ | $x = 0.25$ |
|-----------------------|------------|------------|------------|------------|------------|
| $a = b$ (Å)           | 3.6616     | 3.66127    | 3.66083    | 3.66019    | 3.65994    |
| $c$ (Å)               | 11.99859   | 11.99873   | 12.00043   | 12.00089   | 12.00139   |
| $V$ (Å <sup>3</sup> ) | 160.87     | 160.84     | 160.83     | 160.78     | 160.76     |
| $R_p$                 | 2.19%      | 2.71%      | 2.78%      | 2.18%      | 2.38%      |
| $R_{wp}$              | 2.98%      | 3.87%      | 4.00%      | 2.94%      | 3.31%      |

---

**Table S3.** Luminescence properties of  $\text{Ca}_{0.99+x}\text{Gd}_{1-x}\text{Al}_{1-x}\text{Si}_x\text{O}_4$ :  $\text{Eu}_{0.01}$  ( $x = 0$ - $0.25$ ) samples.

| $x$  | $\tau(\text{Eu}^{3+}, \text{ms})$ | $\tau(\text{Eu}^{2+}, \mu\text{s})$ | QY (%)                                 | QY (%)                                 | $I_{02}/I_{01}$ ratios<br>( $\text{Eu}^{3+}$ ) |
|------|-----------------------------------|-------------------------------------|----------------------------------------|----------------------------------------|------------------------------------------------|
|      |                                   |                                     | $\lambda_{\text{ex}} = 300 \text{ nm}$ | $\lambda_{\text{ex}} = 335 \text{ nm}$ |                                                |
| 0    | 1.11                              | --                                  | 12.0                                   | --                                     | 1.26                                           |
| 0.05 | 1.11                              | 0.678                               | 13.4                                   | 20.2                                   | 1.22                                           |
| 0.10 | 1.10                              | 0.734                               | 15.8                                   | 24.6                                   | 1.18                                           |
| 0.15 | 1.11                              | 0.863                               | 19.7                                   | 28.7                                   | 1.16                                           |
| 0.20 | 1.11                              | 0.737                               | 20.2                                   | 31.5                                   | 1.17                                           |
| 0.25 | 1.12                              | 0.686                               | 22.0                                   | 35.7                                   | 1.15                                           |

---
